# Supplementary material for: WWOX Loses the Ability to Regulate Oncogenic AP-2γ and Synergizes with Tumor Suppressor AP-2α in High-Grade Bladder Cancer
Source: MDPI journal article supplement (doi:10.3390/cancers13122957), 2021-06-12
Supplement: s1 [file s1]

**Table S1. Functional annotation of DEGs in specific comparisons**

| Comparison          | Profile       | Biological process (from PANTHER GO-Slim)                           | Gene(s)                                                                                 | p-value  |
|---------------------|---------------|---------------------------------------------------------------------|-----------------------------------------------------------------------------------------|----------|
| CAL-29<br>KA vs. KK | downregulated | Apoptotic mitochondrial changes                                     | <i>HSPD1</i><br><i>BNIP3L</i><br><i>DNM1L</i>                                           | 7.47E-04 |
|                     |               | Cell adhesion mediated by integrin                                  | <i>ITGB6</i><br><i>ITGB1</i>                                                            | 1.85E-02 |
|                     |               | Cell-cell adhesion                                                  | <i>HSPD1</i><br><i>DSG2</i><br><i>ANXA1</i><br><i>DSG3</i><br><i>TJP1</i><br><i>LPP</i> | 3.21E-02 |
|                     |               | Apoptotic cleavage of cell adhesion proteins                        | <i>DSG2</i><br><i>DSG3</i><br><i>TJP1</i>                                               | 7.47E-04 |
|                     |               | Downregulation of ERBB4 signaling                                   | <i>ITCH</i><br><i>NEDD4</i>                                                             | 7.31E-03 |
|                     |               | Regulation of activated PAK-2p34 by proteasome mediated degradation | <i>PSMD12</i><br><i>PSMD14</i><br><i>PSMC2</i><br><i>PSMD1</i>                          | 5.27E-03 |
|                     |               | Negative regulation of NOTCH4 signaling                             | <i>PSMD12</i><br><i>PSMD14</i><br><i>PSMC2</i><br><i>PSMD1</i>                          | 6.41E-03 |
|                     |               | Regulation of RUNX2 expression and activity                         | <i>PSMD12</i><br><i>PSMD14</i><br><i>STAT1</i><br><i>PSMC2</i><br><i>PSMD1</i>          | 3.17E-03 |
|                     |               | Regulation of RAS by GAPs                                           | <i>PSMD12</i><br><i>PSMD14</i><br><i>PSMC2</i><br><i>PSMD1</i>                          | 1.39E-02 |
|                     | upregulated   | Cell migration                                                      | <i>CCL2</i><br><i>TNFAIP3</i><br><i>CXCL8</i><br><i>S100A9</i><br><i>CXCL1</i>          | 1.08E-03 |
|                     |               | Positive regulation of Wnt signaling pathway                        | <i>TNFAIP3</i><br><i>SULF2</i>                                                          | 3.43E-03 |
|                     |               | Mitotic cell cycle                                                  | <i>CKS2</i><br><i>CENPW</i><br><i>PTTG1</i>                                             | 4.38E-02 |
| CAL-29<br>KC vs. KK | downregulated | Blood vessel morphogenesis                                          | <i>EFNB2</i><br><i>THBS1</i>                                                            | 4.78E-02 |
|                     |               | Negative regulation of cell death                                   | <i>EYA2</i><br><i>AGR2</i><br><i>APOE</i>                                               | 2.74E-02 |
|                     |               | Downregulation of TGF-beta receptor signaling                       | <i>TGFB2</i><br><i>PM2PA1</i><br><i>BAMBI</i>                                           | 1.02E-03 |
|                     |               | Integrin cell surface interactions                                  | <i>COL5A2</i><br><i>COL5A1</i>                                                          | 3.12E-07 |

|                     |               |                                         |                                                                                          |          |
|---------------------|---------------|-----------------------------------------|------------------------------------------------------------------------------------------|----------|
|                     |               |                                         | COL4A2<br>COL4A1<br>FN1<br>COL7A1<br>THBS1<br>TNC                                        |          |
|                     |               | Collagen degradation                    | COL5A2<br>COL5A1<br>COL4A2<br>COL4A1<br>COL7A1                                           | 1.34E-04 |
|                     | upregulated   | Regulation of cell cycle                | NUPR1<br>HBEGF<br>PTTG1<br>PLK1<br>EREG                                                  | 2.16E-02 |
|                     |               | ERBB signaling pathway                  | HBEGF<br>EREG                                                                            | 1.49E-02 |
|                     |               | Regulation of cell growth               | SLIT2<br>SEMA5A                                                                          | 2.66E-02 |
|                     |               | Extracellular matrix organization       | MME<br>LAMB4<br>ADAMTSL4<br>SMOC1<br>MMP28                                               | 2.16E-03 |
|                     |               | Cell migration                          | CXCL3<br>LAMB4<br>RHOF<br>S100A9<br>SEMA5A<br>S100A14                                    | 1.58E-02 |
|                     |               | G2/M DNA damage checkpoint              | H2BC13<br>H2BC5<br>H2BC11<br>H2BC17<br>H2BC15<br>H2BC21                                  | 3.96E-05 |
|                     |               | Oncogene Induced Senescence             | CDKN2A<br>CDKN2B                                                                         | 2.81E-02 |
|                     |               | Degradation of the extracellular matrix | MME<br>FBN2<br>FBN1<br>CAPN8                                                             | 2.30E-02 |
| CAL-29<br>WK vs. KK | downregulated | Programmed cell death                   | HSPD1<br>CASP4<br>ANXA1<br>DDIT4<br>BNIP3<br>BEX2<br>BNIP3L<br>HERPUD1<br>DDIT3<br>HYOU1 | 1.06E-03 |
|                     |               | Positive regulation of angiogenesis     | ANXA1<br>VEGFA                                                                           | 9.34E-03 |

|                     |               |                                                              |                                                                                                                                                                                                                                                                 |          |
|---------------------|---------------|--------------------------------------------------------------|-----------------------------------------------------------------------------------------------------------------------------------------------------------------------------------------------------------------------------------------------------------------|----------|
|                     |               | Negative regulation of intrinsic apoptotic signaling pathway | <i>HERPUD1</i><br><i>HYOU1</i>                                                                                                                                                                                                                                  | 9.34E-03 |
|                     |               | Positive regulation of mitotic cell cycle                    | <i>ANXA1</i><br><i>AREG</i>                                                                                                                                                                                                                                     | 3.27E-02 |
|                     |               | Apoptotic cleavage of cell adhesion proteins                 | <i>DSG3</i><br><i>OCLN</i>                                                                                                                                                                                                                                      | 1.10E-02 |
|                     |               | Negative regulation of NOTCH4 signaling                      | <i>PSMD14</i><br><i>PSMC1</i><br><i>PSMD1</i>                                                                                                                                                                                                                   | 3.09E-02 |
|                     |               | RAF/MAP kinase cascade                                       | <i>ARTN</i><br><i>PSMD14</i><br><i>PSMC1</i><br><i>MET</i><br><i>DUSP4</i><br><i>FN1</i><br><i>PSMD1</i><br><i>AREG</i>                                                                                                                                         | 1.05E-02 |
|                     | upregulated   | Response to tumor necrosis factor                            | <i>CCL2</i><br><i>UBD</i><br><i>CX3CL1</i>                                                                                                                                                                                                                      | 1.53E-02 |
|                     |               | Positive regulation of cell migration                        | <i>SEMA3F</i><br><i>S100A14</i><br><i>CLEC7A</i>                                                                                                                                                                                                                | 3.12E-02 |
|                     |               | Negative regulation of mitotic cell cycle                    | <i>BTG2</i><br><i>ZWINT</i><br><i>PTTG1</i>                                                                                                                                                                                                                     | 3.40E-02 |
|                     |               | Positive regulation of apoptotic process                     | <i>PYDC1</i><br><i>UBD</i><br><i>DAPK1</i>                                                                                                                                                                                                                      | 3.69E-02 |
|                     |               | Cell population proliferation                                | <i>TBX3</i><br><i>BTG2</i><br><i>LYN</i><br><i>STAT6</i><br><i>CDK2</i><br><i>PLA2G2A</i><br><i>S100A13</i><br><i>CLEC7A</i>                                                                                                                                    | 2.26E-03 |
|                     |               | G2/M DNA damage checkpoint                                   | <i>H2BC12</i><br><i>H2BC4</i><br><i>H2BC13</i><br><i>H2BC5</i><br><i>H2BC11</i><br><i>H2BC9</i><br><i>H2BC14</i><br><i>H2BC3</i><br><i>H2AX</i><br><i>H2BC17</i><br><i>H4C9</i><br><i>H4C13</i><br><i>H4C1</i><br><i>H4C4</i><br><i>H2BC15</i><br><i>H2BC21</i> | 4.36E-11 |
| CAL-29<br>WA vs. WK | downregulated | Regulation of Notch signaling pathway                        | <i>GALNT11</i><br><i>DLL1</i>                                                                                                                                                                                                                                   | 7.92E-03 |
|                     |               | Cell Cycle, Mitotic                                          | <i>H2BC12</i>                                                                                                                                                                                                                                                   | 2.76E-14 |

|  |             |                                                                  |                                                                                                                                                                                                                                                                                                                                                                                                                                               |          |
|--|-------------|------------------------------------------------------------------|-----------------------------------------------------------------------------------------------------------------------------------------------------------------------------------------------------------------------------------------------------------------------------------------------------------------------------------------------------------------------------------------------------------------------------------------------|----------|
|  |             |                                                                  | <i>H2AC7</i><br><i>POLA2</i><br><i>H2BC4</i><br><i>LYN</i><br><i>H2BC13</i><br><i>H2AC20</i><br><i>LIG1</i><br><i>H2BC5</i><br><i>H2BC11</i><br><i>TYMS</i><br><i>H2AC14</i><br><i>INCENP</i><br><i>H2BC9</i><br><i>H2BC14</i><br><i>H2BC3</i><br><i>FOXM1</i><br><i>H2BC17</i><br><i>H3C12</i><br><i>H4C9</i><br><i>H4C13</i><br><i>H4C1</i><br><i>H4C4</i><br><i>H4C3</i><br><i>H2BC15</i><br><i>H2BC21</i><br><i>H2AC8</i><br><i>CENPM</i> |          |
|  |             | G2/M DNA damage checkpoint                                       | <i>H2BC12</i><br><i>H2BC4</i><br><i>H2BC13</i><br><i>RMI2</i><br><i>H2BC5</i><br><i>H2BC11</i><br><i>H2BC9</i><br><i>H2BC14</i><br><i>H2BC3</i><br><i>H2BC17</i><br><i>H4C9</i><br><i>H4C13</i><br><i>H4C1</i><br><i>H4C4</i><br><i>H4C3</i><br><i>H2BC15</i><br><i>H2BC21</i>                                                                                                                                                                | 2.15E-14 |
|  | upregulated | Positive regulation of mitotic cell cycle                        | <i>HBEGF</i><br><i>ANXA1</i><br><i>AREG</i><br><i>EREG</i>                                                                                                                                                                                                                                                                                                                                                                                    | 5.13E-05 |
|  |             | Regulation of apoptotic signaling pathway                        | <i>HERPUD1</i><br><i>HYOU1</i>                                                                                                                                                                                                                                                                                                                                                                                                                | 3.43E-02 |
|  |             | Regulation of epidermal growth factor receptor signaling pathway | <i>HBEGF</i><br><i>AREG</i><br><i>EREG</i>                                                                                                                                                                                                                                                                                                                                                                                                    | 5.83E-04 |
|  |             | Wound healing                                                    | <i>ANXA1</i><br><i>ANXA6</i>                                                                                                                                                                                                                                                                                                                                                                                                                  | 3.61E-02 |
|  |             | Positive regulation of cell population proliferation             | <i>HBEGF</i><br><i>ANXA1</i>                                                                                                                                                                                                                                                                                                                                                                                                                  | 7.93E-03 |

|                     |               |                                                            |                                                                                                                                                                   |          |
|---------------------|---------------|------------------------------------------------------------|-------------------------------------------------------------------------------------------------------------------------------------------------------------------|----------|
| CAL-29<br>WC vs. WK |               |                                                            | AREG<br>EREG                                                                                                                                                      |          |
|                     |               | Extracellular matrix organization                          | COL5A1<br>MMP13<br>COL4A2<br>SULF2                                                                                                                                | 1.81E-02 |
|                     | downregulated | Negative regulation of mitotic cell cycle                  | BTG2<br>RBL2                                                                                                                                                      | 3.29E-02 |
|                     |               | Apoptotic process                                          | CD74<br>PYDC1<br>UBD<br>CRIP1                                                                                                                                     | 2.56E-02 |
|                     |               | Negative regulation of cell population proliferation       | BTG2<br>LGALS9<br>PLA2G2A                                                                                                                                         | 8.32E-04 |
|                     |               | Negative regulation of MAP kinase activity                 | DUSP2<br>DUSP1                                                                                                                                                    | 3.99E-03 |
|                     |               | Positive regulation of apoptotic process                   | PYDC1<br>UBD                                                                                                                                                      | 3.49E-02 |
|                     | upregulated   | Positive regulation of mitotic cell cycle                  | HBEGF<br>RANBP1<br>AREG                                                                                                                                           | 1.75E-03 |
|                     |               | Cell population proliferation                              | CAV2<br>HBEGF<br>ZPR1<br>TGFB2<br>RTKN2<br>MYC<br>CAV1<br>S100A13<br>AREG                                                                                         | 1.97E-04 |
|                     |               | Transforming growth factor beta receptor signaling pathway | TGFB2<br>PMEPA1<br>ZYX                                                                                                                                            | 4.82E-03 |
|                     |               | ERBB signaling pathway                                     | HBEGF<br>AREG                                                                                                                                                     | 2.61E-02 |
|                     |               | Mitotic cell cycle process                                 | CCNB1<br>TUBB<br>HBEGF<br>CKS2<br>CENPW<br>TUBA4A<br>TUBB2A<br>TUBB4B<br>RANBP1<br>RTKN2<br>MAD2L1<br>TUBA1A<br>TUBA1B<br>SKA1<br>PLK1<br>TUBB3<br>TUBA1C<br>AREG | 7.44E-10 |
|                     |               | Extracellular matrix organization                          | HAS3<br>COL5A1                                                                                                                                                    | 2.55E-04 |

|                                    |               |                                                                  |                                                                                                                                                                                                        |          |
|------------------------------------|---------------|------------------------------------------------------------------|--------------------------------------------------------------------------------------------------------------------------------------------------------------------------------------------------------|----------|
|                                    |               |                                                                  | <i>MMP13</i><br><i>MMP9</i><br><i>COL4A2</i><br><i>COL4A1</i><br><i>SULF2</i>                                                                                                                          |          |
|                                    |               | Positive regulation of cell population proliferation             | <i>HBEGF</i><br><i>RTKN2</i><br><i>MYC</i><br><i>S100A13</i><br><i>AREG</i>                                                                                                                            | 2.78E-03 |
|                                    |               | Wnt signaling pathway                                            | <i>DKK1</i><br><i>DKK3</i><br><i>WNT4</i><br><i>SULF2</i>                                                                                                                                              | 4.00E-02 |
|                                    |               | Degradation of the extracellular matrix                          | <i>COL5A1</i><br><i>LAMC2</i><br><i>KLK7</i><br><i>MMP13</i><br><i>MMP9</i><br><i>COL4A2</i><br><i>COL4A1</i>                                                                                          | 7.47E-04 |
| <b>HT-1376</b><br><b>KA vs. KK</b> | downregulated | Endothelial cell migration                                       | <i>S100P</i>                                                                                                                                                                                           | 6.78E-03 |
|                                    |               | Cell death signalling via NRAGE, NRIF and NADE                   | <i>MCF2L</i>                                                                                                                                                                                           | 3.68E-02 |
|                                    |               | Crosslinking of collagen fibrils                                 | <i>LOXL4</i>                                                                                                                                                                                           | 9.18E-03 |
|                                    |               | Pre-NOTCH Expression and Processing                              | <i>ELF3</i>                                                                                                                                                                                            | 3.77E-02 |
|                                    |               | Extracellular matrix organization                                | <i>ELF3</i><br><i>LOXL4</i>                                                                                                                                                                            | 1.28E-02 |
|                                    |               | Positive regulation of apoptotic process                         | <i>TXNIP</i><br><i>MCF2L</i>                                                                                                                                                                           | 2.89E-02 |
|                                    |               | Transmembrane receptor protein tyrosine kinase signaling pathway | <i>TXNIP</i><br><i>ATP6V1B1</i>                                                                                                                                                                        | 2.56E-02 |
|                                    | upregulated   | Cell migration                                                   | <i>CCL2</i><br><i>FSCN1</i><br><i>TUBB2A</i>                                                                                                                                                           | 1.28E-02 |
|                                    |               | p130Cas linkage to MAPK signaling for integrins                  | <i>FN1</i>                                                                                                                                                                                             | 2.91E-02 |
|                                    |               | Integrin binding                                                 | <i>CCN1</i><br><i>FN1</i>                                                                                                                                                                              | 2.11E-03 |
|                                    |               | Regulation of cell population proliferation                      | <i>CCL2</i><br><i>EGR1</i><br><i>TGM2</i><br><i>MAL</i><br><i>FGFBP1</i><br><i>IL24</i><br><i>SGK1</i><br><i>CCN1</i><br><i>SERPINE2</i><br><i>DHRS2</i><br><i>DDAH1</i><br><i>FN1</i><br><i>FOSL1</i> | 5.12E-06 |
|                                    |               | Angiogenesis                                                     | <i>CCL2</i><br><i>CCN1</i><br><i>FN1</i>                                                                                                                                                               | 2.19E-02 |
|                                    |               | Regulation of cell adhesion                                      | <i>CCL2</i><br><i>TGM2</i><br><i>CCN1</i>                                                                                                                                                              | 1.02E-02 |

|                      |               |                                                                          |                                                                                                                                                                                                                              |          |
|----------------------|---------------|--------------------------------------------------------------------------|------------------------------------------------------------------------------------------------------------------------------------------------------------------------------------------------------------------------------|----------|
|                      |               |                                                                          | <i>SERPINE2</i><br><i>FN1</i>                                                                                                                                                                                                |          |
|                      |               | Regulation of growth                                                     | <i>SGK1</i><br><i>STC2</i><br><i>SERPINE2</i><br><i>MT1G</i><br><i>FN1</i>                                                                                                                                                   | 7.82E-03 |
|                      |               | Positive regulation of apoptotic process                                 | <i>CCL2</i><br><i>TGM2</i><br><i>FOSL1</i><br><i>MAL</i>                                                                                                                                                                     | 1.96E-02 |
|                      |               | Positive regulation of I-kappaB kinase/NF-kappaB signaling               | <i>TGM2</i><br><i>MAL</i>                                                                                                                                                                                                    | 4.69E-02 |
|                      |               | Extracellular matrix organization                                        | <i>CCN1</i><br><i>KLK5</i><br><i>FN1</i>                                                                                                                                                                                     | 2.95E-02 |
|                      |               | Regulation of cell growth                                                | <i>SGK1</i><br><i>SERPINE2</i><br><i>FN1</i>                                                                                                                                                                                 | 4.23E-02 |
| HT-1376<br>KC vs. KK | downregulated | Glial cell proliferation                                                 | <i>CLU</i>                                                                                                                                                                                                                   | 2.42E-02 |
|                      |               | Positive regulation of fibroblast apoptotic process                      | <i>BTG1</i>                                                                                                                                                                                                                  | 1.22E-02 |
|                      |               | Regulation of cell population proliferation                              | <i>CLU</i><br><i>BTG1</i><br><i>HTRA1</i><br><i>ATOH8</i><br><i>ZNF703</i><br><i>CTSH</i>                                                                                                                                    | 2.25E-02 |
|                      |               | Regulation of transforming growth factor beta receptor signaling pathway | <i>HTRA1</i><br><i>ZNF703</i>                                                                                                                                                                                                | 1.24E-02 |
|                      |               | Positive regulation of cell migration                                    | <i>ATOH8</i><br><i>ZNF703</i><br><i>CTSH</i>                                                                                                                                                                                 | 3.37E-02 |
|                      | upregulated   | Regulation of cell-cell adhesion                                         | <i>CD74</i><br><i>ADAM8</i><br><i>CCL2</i><br><i>TNF</i><br><i>CD70</i><br><i>ANXA1</i><br><i>PODXL</i><br><i>LGALS1</i><br><i>TGFB1</i><br><i>PYCARD</i><br><i>ICAM1</i><br><i>IGFBP2</i><br><i>CEBPB</i><br><i>ZC3H12A</i> | 1.70E-07 |
|                      |               | Regulation of cell migration                                             | <i>CD74</i><br><i>ADAM8</i><br><i>CCL2</i><br><i>GLIPR2</i><br><i>TNF</i><br><i>ANXA1</i><br><i>LAMA3</i><br><i>PODXL</i><br><i>GAS6</i><br><i>IL24</i>                                                                      | 4.76E-09 |

|  |  |                                                                         |                                                                                                                                                                                                                                                                                                                                                           |          |
|--|--|-------------------------------------------------------------------------|-----------------------------------------------------------------------------------------------------------------------------------------------------------------------------------------------------------------------------------------------------------------------------------------------------------------------------------------------------------|----------|
|  |  |                                                                         | <i>ITGB1</i><br><i>MYLK</i><br><i>TGFB1</i><br><i>S100A7</i><br><i>PYCARD</i><br><i>ICAM1</i><br><i>HIF1A</i><br><i>SOD2</i><br><i>CEMIP</i><br><i>ZC3H12A</i><br><i>TGFBR1</i><br><i>SEMA3C</i>                                                                                                                                                          |          |
|  |  | Negative regulation of endothelial cell-matrix adhesion via fibronectin | <i>MME</i>                                                                                                                                                                                                                                                                                                                                                | 1.10E-02 |
|  |  | Negative regulation of cell adhesion                                    | <i>CD74</i><br><i>MME</i><br><i>ANXA1</i><br><i>PODXL</i><br><i>LGALS1</i><br><i>TGFB1</i><br><i>CEBPB</i><br><i>ZC3H12A</i>                                                                                                                                                                                                                              | 2.15E-04 |
|  |  | Negative regulation of apoptotic process                                | <i>CD74</i><br><i>ADAM8</i><br><i>CCL2</i><br><i>TNF</i><br><i>ANXA1</i><br><i>GAS6</i><br><i>ITGB1</i><br><i>CHST11</i><br><i>IER3</i><br><i>ICAM1</i><br><i>SERPINB2</i><br><i>HIF1A</i><br><i>SOD2</i><br><i>DHRS2</i><br><i>SOCS3</i><br><i>FCMR</i><br><i>CEBPB</i><br><i>MT1G</i><br><i>ZC3H12A</i><br><i>TGFBR1</i><br><i>ITGA5</i><br><i>PLK3</i> | 6.78E-09 |
|  |  | Cell migration                                                          | <i>CD74</i><br><i>ADAM8</i><br><i>MME</i><br><i>S100A2</i><br><i>CCL2</i><br><i>CXCL3</i><br><i>TNF</i><br><i>FSCN1</i><br><i>ANXA1</i><br><i>SAA1</i><br><i>LAMA3</i><br><i>PODXL</i><br><i>GAS6</i>                                                                                                                                                     | 1.44E-10 |



|  |  |                                                    |                                                                                                                                                                                                                                             |          |
|--|--|----------------------------------------------------|---------------------------------------------------------------------------------------------------------------------------------------------------------------------------------------------------------------------------------------------|----------|
|  |  |                                                    | <i>TUBB2A</i><br><i>ITGB1</i><br><i>TGFB1</i><br><i>ANXA6</i><br><i>S100A9</i><br><i>ICAM1</i><br><i>HIF1A</i><br><i>S100A8</i><br><i>PSG1</i><br><i>TGFBR1</i><br><i>SEMA3C</i><br><i>ITGA5</i>                                            |          |
|  |  | Wound healing                                      | <i>MME</i><br><i>SERPINA1</i><br><i>SAA1</i><br><i>GAS6</i><br><i>IL24</i><br><i>TGFB1</i><br><i>ANXA6</i><br><i>SERPINB2</i><br><i>HIF1A</i><br><i>S100A8</i><br><i>TGFBR1</i><br><i>ITGA5</i>                                             | 7.30E-06 |
|  |  | Cell adhesion mediated by integrin                 | <i>ITGB1</i><br><i>ICAM1</i><br><i>ITGA5</i>                                                                                                                                                                                                | 4.32E-04 |
|  |  | angiogenesis                                       | <i>ADAM8</i><br><i>CCL2</i><br><i>TYMP</i><br><i>SAT1</i><br><i>ITGB1</i><br><i>S100A7</i><br><i>COL8A1</i><br><i>HIF1A</i><br><i>ZC3H12A</i><br><i>TGFBR1</i><br><i>ITGA5</i>                                                              | 2.39E-06 |
|  |  | Regulation of extracellular matrix organization    | <i>FSCN1</i><br><i>TGFB1</i>                                                                                                                                                                                                                | 2.44E-02 |
|  |  | Positive regulation of programmed cell death       | <i>ADAM8</i><br><i>CCL2</i><br><i>TNF</i><br><i>UBD</i><br><i>TGM2</i><br><i>ANXA1</i><br><i>ITGB1</i><br><i>TGFB1</i><br><i>S100A9</i><br><i>INHBA</i><br><i>PYCARD</i><br><i>SOD2</i><br><i>S100A8</i><br><i>ZC3H12A</i><br><i>TGFBR1</i> | 7.38E-07 |
|  |  | Regulation of epithelial to mesenchymal transition | <i>GLIPR2</i><br><i>TGFB1</i>                                                                                                                                                                                                               | 1.56E-02 |

|                                    |               |                                                                |                                                                                                                                                                                                                                                                               |          |
|------------------------------------|---------------|----------------------------------------------------------------|-------------------------------------------------------------------------------------------------------------------------------------------------------------------------------------------------------------------------------------------------------------------------------|----------|
|                                    |               |                                                                | <i>TGFB1</i>                                                                                                                                                                                                                                                                  |          |
|                                    |               | Regulation of intrinsic apoptotic signaling pathway            | <i>CD74</i><br><i>S100A9</i><br><i>PYCARD</i><br><i>HIF1A</i><br><i>SOD2</i><br><i>S100A8</i>                                                                                                                                                                                 | 3.48E-04 |
|                                    |               | Positive regulation of SMAD protein signal transduction        | <i>TGFB1</i><br><i>TGFB1</i>                                                                                                                                                                                                                                                  | 4.34E-03 |
|                                    |               | Extrinsic apoptotic signaling pathway                          | <i>TNF</i><br><i>CD70</i><br><i>TGFB1</i><br><i>INHBA</i><br><i>LCN2</i><br><i>IFI27</i>                                                                                                                                                                                      | 2.39E-05 |
|                                    |               | Negative regulation of anoikis                                 | <i>ITGB1</i><br><i>ITGA5</i>                                                                                                                                                                                                                                                  | 5.35E-03 |
|                                    |               | Positive regulation of NF-kappaB transcription factor activity | <i>ADAM8</i><br><i>TNF</i><br><i>TGFB1</i><br><i>S100A9</i><br><i>PYCARD</i><br><i>ICAM1</i><br><i>S100A8</i>                                                                                                                                                                 | 4.37E-05 |
|                                    |               | Negative regulation of tumor necrosis factor production        | <i>GAS6</i><br><i>ZC3H12A</i>                                                                                                                                                                                                                                                 | 4.07E-02 |
|                                    |               | Activation of MAPK activity                                    | <i>CD74</i><br><i>TNF</i><br><i>SAA1</i><br><i>INAVA</i>                                                                                                                                                                                                                      | 1.19E-02 |
|                                    |               | Regulation of cell growth                                      | <i>TGFB1</i><br><i>S100A9</i><br><i>INHBA</i><br><i>S100A8</i><br><i>TGFB1</i><br><i>SEMA3C</i>                                                                                                                                                                               | 3.02E-02 |
| <b>HT-1376</b><br><b>WK vs. KK</b> | downregulated | Positive regulation of epithelial to mesenchymal transition    | <i>TGFB2</i><br><i>ZNF703</i><br><i>CTNNB1</i>                                                                                                                                                                                                                                | 6.55E-03 |
|                                    |               | Regulation of programmed cell death                            | <i>TNFSF10</i><br><i>CLU</i><br><i>MTRNR2L2</i><br><i>MTRNR2L12</i><br><i>TXNIP</i><br><i>PPIA</i><br><i>FHL2</i><br><i>MTRNR2L8</i><br><i>DAPK1</i><br><i>UBC</i><br><i>PPT1</i><br><i>PLAC8</i><br><i>SCIN</i><br><i>TGFB2</i><br><i>SON</i><br><i>CRYAB</i><br><i>HPGD</i> | 4.02E-08 |

|  |  |                                                            |                                                                                                                                                                                                                                       |          |
|--|--|------------------------------------------------------------|---------------------------------------------------------------------------------------------------------------------------------------------------------------------------------------------------------------------------------------|----------|
|  |  |                                                            | <i>ADAMTSL4</i><br><i>BEX2</i><br><i>LDHA</i><br><i>TIMP3</i><br><i>CTNNB1</i><br><i>EIF2AK4</i><br><i>CITED2</i><br><i>PDIA3</i><br><i>NONO</i><br><i>SEMA5A</i><br><i>PARP1</i><br><i>SKP2</i><br><i>PLAC8</i>                      |          |
|  |  | Negative regulation of cell cycle                          | <i>ZNF207</i><br><i>RBBP4</i><br><i>TGFB2</i><br><i>HPGD</i><br><i>SKP1</i><br><i>CHMP4C</i><br><i>CTNNB1</i><br><i>EIF2AK4</i><br><i>TFDP2</i><br><i>HSP90AB1</i>                                                                    | 1.28E-02 |
|  |  | Transforming growth factor beta receptor signaling pathway | <i>UBC</i><br><i>TGFBR3</i><br><i>TGFB2</i><br><i>HPGD</i><br><i>CITED2</i><br><i>PARP1</i>                                                                                                                                           | 1.38E-04 |
|  |  | Regulation of cell cycle process                           | <i>PRC1</i><br><i>TPX2</i><br><i>KIF20A</i><br><i>ZNF207</i><br><i>RACGAP1</i><br><i>RBBP4</i><br><i>ADAMTS1</i><br><i>HNRNPU</i><br><i>CALM1</i><br><i>SKP1</i><br><i>CHMP4C</i><br><i>CTNNB1</i><br><i>TFDP2</i><br><i>HSP90AB1</i> | 2.23E-03 |
|  |  | Positive regulation of cell population proliferation       | <i>PRC1</i><br><i>ADAMTS1</i><br><i>HTRA1</i><br><i>HNRNPU</i><br><i>TGFBR3</i><br><i>TGFB2</i><br><i>HPGD</i><br><i>ZNF703</i><br><i>CTNNB1</i><br><i>SEMA5A</i><br><i>CD55</i><br><i>SKP2</i><br><i>PLAC8</i>                       | 3.24E-02 |
|  |  | Negative regulation of cell cycle process                  | <i>ZNF207</i>                                                                                                                                                                                                                         | 4.02E-02 |

|  |             |                                                                                   |                                                                                                                                                                                                   |          |
|--|-------------|-----------------------------------------------------------------------------------|---------------------------------------------------------------------------------------------------------------------------------------------------------------------------------------------------|----------|
|  |             |                                                                                   | <i>RBBP4</i><br><i>SKP1</i><br><i>CHMP4C</i><br><i>TFDP2</i><br><i>HSP90AB1</i>                                                                                                                   |          |
|  |             | Cell growth                                                                       | <i>SEMA3F</i><br><i>CTNNB1</i><br><i>EIF2AK4</i><br><i>SEMA5A</i><br><i>HSP90AB1</i>                                                                                                              | 8.09E-04 |
|  |             | Regulation of intrinsic apoptotic signaling pathway                               | <i>CLU</i><br><i>PPIA</i><br><i>NONO</i><br><i>PARP1</i>                                                                                                                                          | 3.68E-02 |
|  |             | Positive regulation of cell size                                                  | <i>PRR16</i><br><i>HSP90AB1</i>                                                                                                                                                                   | 4.76E-03 |
|  |             | Positive regulation of transforming growth factor beta receptor signaling pathway | <i>TGFB3</i><br><i>CITED2</i><br><i>HSP90AB1</i>                                                                                                                                                  | 1.73E-03 |
|  |             | Extracellular structure organization                                              | <i>COL12A1</i><br><i>ADAMTS1</i><br><i>HTRA1</i><br><i>LAMB4</i><br><i>TGFB2</i><br><i>ADAMTSL4</i><br><i>FBN2</i><br><i>FBN1</i><br><i>LOXL4</i>                                                 | 2.00E-03 |
|  |             | Wnt signaling pathway, calcium modulating pathway                                 | <i>CALM1</i><br><i>CTNNB1</i>                                                                                                                                                                     | 3.27E-02 |
|  |             | Negative regulation of cell population proliferation                              | <i>RBBP4</i><br><i>ADAMTS1</i><br><i>SCIN</i><br><i>ATP5F1A</i><br><i>TGFB3</i><br><i>TGFB2</i><br><i>ATOH8</i><br><i>P3H2</i><br><i>CTNNB1</i><br><i>IGFBP7</i><br><i>CITED2</i><br><i>ASCL2</i> | 1.16E-02 |
|  |             | Positive regulation of epithelial cell migration                                  | <i>ATP5F1A</i><br><i>TGFB2</i><br><i>ATOH8</i><br><i>SEMA5A</i>                                                                                                                                   | 2.97E-02 |
|  |             | Angiogenesis                                                                      | <i>GJA5</i><br><i>TGFB3</i><br><i>THSD7A</i><br><i>CTNNB1</i><br><i>CLIC4</i><br><i>SEMA5A</i>                                                                                                    | 3.74E-02 |
|  | upregulated | Negative regulation of MAPK cascade                                               | <i>DUSP2</i><br><i>DUSP6</i><br><i>LIF</i><br><i>TNIP1</i>                                                                                                                                        | 2.28E-03 |

|  |  |                                                                          |                                                                                                                                                                           |          |
|--|--|--------------------------------------------------------------------------|---------------------------------------------------------------------------------------------------------------------------------------------------------------------------|----------|
|  |  |                                                                          | <i>DUSP4</i><br><i>DUSP7</i><br><i>EPHB2</i>                                                                                                                              |          |
|  |  | Negative regulation of apoptotic signaling pathway                       | <i>BID</i><br><i>CD74</i><br><i>PLAUR</i><br><i>TNFAIP3</i><br><i>CSF2</i><br><i>WNT4</i><br><i>MMP9</i><br><i>THBS1</i>                                                  | 2.93E-03 |
|  |  | Negative regulation of meiotic cell cycle                                | <i>OVOL1</i><br><i>LIF</i>                                                                                                                                                | 1.51E-02 |
|  |  | Negative regulation of cell migration                                    | <i>CD74</i><br><i>CARD10</i><br><i>ADGRG1</i><br><i>IL24</i><br><i>IGFBP3</i><br><i>WNT4</i><br><i>KRT16</i><br><i>ALOX15B</i><br><i>THBS1</i>                            | 2.03E-03 |
|  |  | Regulation of extracellular matrix organization                          | <i>SOX9</i><br><i>FSCN1</i><br><i>TNFRSF1B</i>                                                                                                                            | 1.01E-02 |
|  |  | Regulation of angiogenesis                                               | <i>TNFAIP3</i><br><i>VEGFA</i><br><i>HMGA2</i><br><i>C3</i><br><i>CXCL8</i><br><i>TWIST1</i><br><i>ALOX5</i><br><i>ZC3H12A</i><br><i>THBS1</i><br><i>F3</i><br><i>NMB</i> | 1.84E-04 |
|  |  | Negative regulation of sprouting angiogenesis                            | <i>ALOX5</i><br><i>THBS1</i>                                                                                                                                              | 7.15E-03 |
|  |  | Negative regulation of MAP kinase activity                               | <i>DUSP2</i><br><i>DUSP6</i><br><i>DUSP4</i><br><i>DUSP7</i>                                                                                                              | 8.73E-03 |
|  |  | Positive regulation of extrinsic apoptotic signaling pathway             | <i>BID</i><br><i>INHBA</i><br><i>PYCARD</i><br><i>G0S2</i><br><i>THBS1</i><br><i>MAL</i>                                                                                  | 2.15E-05 |
|  |  | Negative regulation of cell migration involved in sprouting angiogenesis | <i>CARD10</i><br><i>THBS1</i>                                                                                                                                             | 1.21E-02 |
|  |  | Mesenchymal to epithelial transition                                     | <i>ALOX5</i><br><i>ALOX15B</i>                                                                                                                                            | 1.36E-02 |
|  |  | Intrinsic apoptotic signaling pathway                                    | <i>DDIT4</i><br><i>CDKN1A</i><br><i>TNFRSF1B</i><br><i>PYCARD</i>                                                                                                         | 4.92E-03 |

|                                    |               |                                                                  |                                                                                                                           |          |
|------------------------------------|---------------|------------------------------------------------------------------|---------------------------------------------------------------------------------------------------------------------------|----------|
|                                    |               |                                                                  | <i>IKBKE</i><br><i>CEBPB</i>                                                                                              |          |
|                                    |               | Positive regulation of extracellular matrix organization         | <i>LIF</i><br><i>INHBA</i>                                                                                                | 2.36E-02 |
|                                    |               | Extracellular matrix disassembly                                 | <i>ADAM8</i><br><i>MMP2</i><br><i>KLK7</i><br><i>MMP9</i><br><i>KLK5</i>                                                  | 7.11E-04 |
|                                    |               | Extrinsic apoptotic signaling pathway                            | <i>BID</i><br><i>CD70</i><br><i>TNFRSF1B</i><br><i>INHBA</i><br><i>LCN2</i><br><i>GOS2</i><br><i>IFI27</i>                | 8.71E-05 |
|                                    |               | Extracellular matrix assembly                                    | <i>HAS3</i><br><i>COL1A2</i>                                                                                              | 4.49E-02 |
|                                    |               | Positive regulation of angiogenesis                              | <i>VEGFA</i><br><i>HMGA2</i><br><i>C3</i><br><i>CXCL8</i><br><i>TWIST1</i><br><i>ZC3H12A</i><br><i>THBS1</i><br><i>F3</i> | 2.64E-04 |
|                                    |               | Positive regulation of tumor necrosis factor production          | <i>MAL</i><br><i>PYCARD</i><br><i>TWIST1</i><br><i>THBS1</i>                                                              | 1.20E-02 |
|                                    |               | Positive regulation of NF-kappaB transcription factor activity   | <i>ADAM8</i><br><i>MAL</i><br><i>IRAK2</i><br><i>NFKB2</i><br><i>S100A9</i><br><i>PYCARD</i><br><i>S100A8</i>             | 1.60E-03 |
|                                    |               | Cell cycle arrest                                                | <i>CD74</i><br><i>MAL</i><br><i>VEGFA</i><br><i>S100A7</i><br><i>JUN</i><br><i>PYCARD</i><br><i>NMB</i>                   | 5.86E-03 |
| <b>HT-1376</b><br><b>WA vs. WK</b> | downregulated | Negative regulation of epithelial cell proliferation             | <i>SOX9</i><br><i>EFNB2</i><br><i>ALOX5</i><br><i>THBS1</i>                                                               | 4.71E-02 |
|                                    |               | Negative regulation of growth hormone receptor signaling pathway | <i>GDF15</i>                                                                                                              | 8.74E-04 |
|                                    |               | Extrinsic apoptotic signaling pathway                            | <i>LCN2</i>                                                                                                               | 2.85E-02 |
|                                    |               | SMAD protein signal transduction                                 | <i>GDF15</i>                                                                                                              | 1.82E-02 |
|                                    |               | Transforming growth factor beta receptor signaling pathway       | <i>GDF15</i>                                                                                                              | 2.88E-02 |
|                                    |               | Positive regulation of MAPK cascade                              | <i>S100A7</i><br><i>GDF15</i>                                                                                             | 9.18E-03 |

|  |             |                                                                                                         |                                                                                                                                            |          |
|--|-------------|---------------------------------------------------------------------------------------------------------|--------------------------------------------------------------------------------------------------------------------------------------------|----------|
|  | upregulated | Negative regulation of apoptotic process                                                                | <i>CCL2</i><br><i>UBC</i><br><i>GAS6</i><br><i>CTNNB1</i><br><i>MT1G</i><br><i>THBS1</i>                                                   | 2.57E-03 |
|  |             | Regulation of cell population proliferation                                                             | <i>CCNB1</i><br><i>CCL2</i><br><i>GAS6</i><br><i>ATP5F1A</i><br><i>TPM1</i><br><i>CTNNB1</i><br><i>GSDME</i><br><i>THBS1</i><br><i>TNC</i> | 7.56E-04 |
|  |             | Canonical Wnt signaling pathway involved in positive regulation of epithelial to mesenchymal transition | <i>CTNNB1</i>                                                                                                                              | 4.65E-03 |
|  |             | Negative regulation of cell cycle                                                                       | <i>CCNB1</i><br><i>CCL2</i><br><i>CTNNB1</i><br><i>THBS1</i>                                                                               | 1.19E-02 |
|  |             | Canonical Wnt signaling pathway involved in negative regulation of apoptotic process                    | <i>CTNNB1</i>                                                                                                                              | 6.19E-03 |
|  |             | Negative regulation of cell population proliferation                                                    | <i>CCL2</i><br><i>ATP5F1A</i><br><i>TPM1</i><br><i>CTNNB1</i><br><i>GSDME</i><br><i>THBS1</i>                                              | 6.56E-04 |
|  |             | Regulation of apoptotic signaling pathway                                                               | <i>CTNNB1</i><br><i>PARP1</i><br><i>GSDME</i><br><i>THBS1</i>                                                                              | 2.30E-03 |
|  |             | Positive regulation of apoptotic process                                                                | <i>CCL2</i><br><i>UBC</i><br><i>CTNNB1</i><br><i>GSDME</i><br><i>THBS1</i>                                                                 | 1.65E-03 |
|  |             | Negative regulation of angiogenesis                                                                     | <i>CTNNB1</i><br><i>THBS1</i>                                                                                                              | 1.19E-02 |
|  |             | Mitotic cell cycle process                                                                              | <i>CCNB1</i><br><i>CCNJL</i><br><i>RAN</i><br><i>STMN1</i>                                                                                 | 2.01E-02 |
|  |             | Positive regulation of immune response to tumor cell                                                    | <i>GSDME</i>                                                                                                                               | 2.30E-02 |
|  |             | Positive regulation of SMAD protein signal transduction                                                 | <i>PARP1</i>                                                                                                                               | 2.61E-02 |
|  |             | Angiogenesis                                                                                            | <i>CCL2</i><br><i>PRCP</i><br><i>CTNNB1</i><br><i>THBS1</i>                                                                                | 1.57E-03 |
|  |             | Necrotic cell death                                                                                     | <i>GSDME</i>                                                                                                                               | 4.70E-02 |
|  |             | Extracellular matrix organization                                                                       | <i>GAS6</i><br><i>THBS1</i><br><i>TNC</i>                                                                                                  | 1.88E-02 |

|                                    |               |                                                              |                                                                                                          |          |
|------------------------------------|---------------|--------------------------------------------------------------|----------------------------------------------------------------------------------------------------------|----------|
|                                    |               | Negative regulation of G1/S transition of mitotic cell cycle | <i>CCNB1</i><br><i>CCL2</i>                                                                              | 1.24E-02 |
|                                    |               | Positive regulation of MAPK cascade                          | <i>CCL2</i><br><i>UBC</i><br><i>GAS6</i><br><i>CTNNB1</i><br><i>GSDME</i><br><i>CAP1</i><br><i>THBS1</i> | 1.42E-05 |
| <b>HT-1376</b><br><b>WC vs. WK</b> | downregulated | Positive regulation of apoptotic signaling pathway           | <i>CTSC</i>                                                                                              | 1.85E-02 |
|                                    |               | Cell killing                                                 | <i>CTSC</i>                                                                                              | 1.74E-02 |
|                                    |               | Positive regulation of inflammatory response                 | <i>CTSC</i>                                                                                              | 2.04E-02 |
|                                    |               | Negative regulation of myelination                           | <i>CTSC</i>                                                                                              | 1.16E-03 |
|                                    | upregulated   | Negative regulation of apoptotic process                     | <i>CLU</i><br><i>MTRNR2L2</i><br><i>MTRNR2L12</i><br><i>MTRNR2L8</i><br><i>GAS6</i>                      | 7.20E-03 |
|                                    |               | Negative regulation of execution phase of apoptosis          | <i>MTRNR2L2</i><br><i>MTRNR2L12</i><br><i>MTRNR2L8</i>                                                   | 5.71E-06 |
|                                    |               | Cell adhesion                                                | <i>L1CAM</i><br><i>GAS6</i><br><i>BCAM</i><br><i>ROBO3</i>                                               | 3.79E-02 |
|                                    |               | Regulation of tumor necrosis factor production               | <i>CLU</i><br><i>GAS6</i>                                                                                | 1.67E-02 |
|                                    |               | Positive regulation of I-kappaB kinase/NF-kappaB signaling   | <i>UBD</i><br><i>S100A4</i>                                                                              | 2.68E-02 |
